# Supplementary material for: Double burden of malnutrition in children aged 24 to 59 months by socioeconomic status in five South Asian countries: evidence from demographic and health surveys
Source: PubMed Central journal article supplement — BMJ Open. 2020 Mar 16;10(3):e032866. doi: 10.1136/bmjopen-2019-032866 (PMC7076246; doi:10.1136/bmjopen-2019-032866), 2020-03-16
Supplement: bmjopen-2019-032866supp001.pdf [file bmjopen-2019-032866supp001.pdf]

**Double burden of malnutrition in children aged 24-59 months by  
socioeconomic status in five south Asian countries: evidence from  
Demographic and Health Surveys**

Fariha Binte Hossain, Md Shajedur Rahman Shawon, Md Shehab Uddin Al-Abid,  
Sultan Mahmood, Gourab Adhikary, Md M Islam Bulbul

**Supplementary materials**

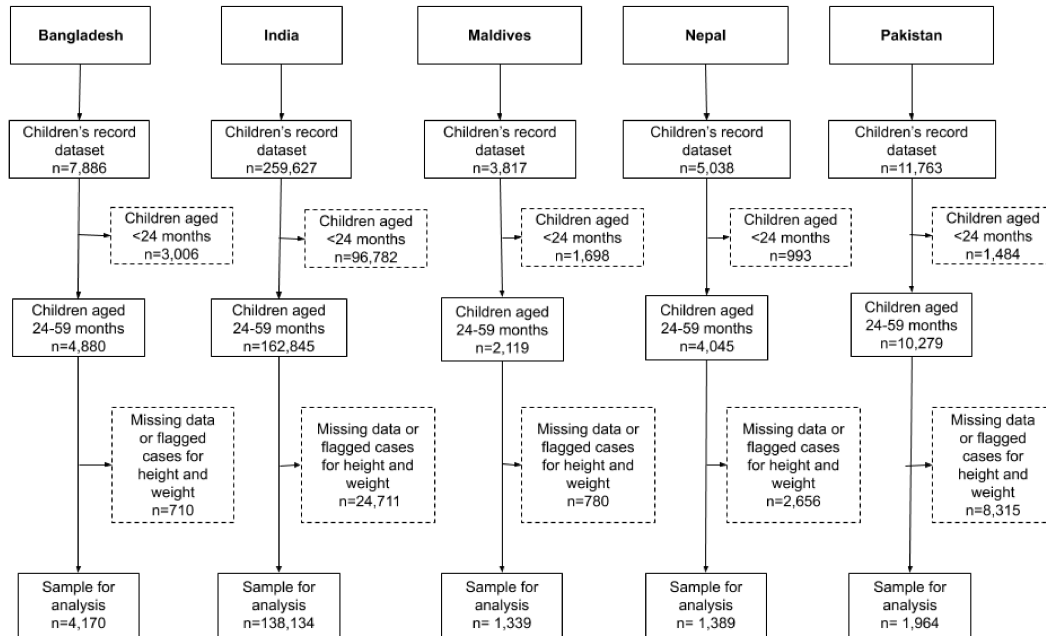

**Figure S1: Flowchart of study participants included in this analysis**

**Table S1: Prevalence of underweight and overweight with 95% confidence intervals (95% CIs) in five South Asian countries, overall and by household's wealth index and highest education level**

|                                                | Bangladesh       | India            | Maldives         | Nepal            | Pakistan         |
|------------------------------------------------|------------------|------------------|------------------|------------------|------------------|
| <b>Prevalence of underweight*, % (95% CIs)</b> |                  |                  |                  |                  |                  |
| Overall                                        | 37.0 (35.6-38.5) | 38.1 (37.9-38.4) | 18.5 (16.5-20.7) | 29.2 (26.9-31.7) | 28.2 (26.3-30.2) |
| Wealth index                                   |                  |                  |                  |                  |                  |
| Poorest                                        | 49.5 (46.4-52.7) | 50.7 (50.1-51.2) | 26.3 (21.4-31.9) | 35.8 (30.4-41.6) | 43.5 (39.2-47.9) |
| Poorer                                         | 44.0 (40.5-47.5) | 43.7 (43.2-44.3) | 21.0 (16.5-26.5) | 28.4 (23.6-33.8) | 32.3 (28.0-36.9) |
| Middle                                         | 37.2 (33.9-40.6) | 36.1 (35.6-36.7) | 21.6 (17.1-26.8) | 35.8 (30.6-41.3) | 23.4 (19.3-28.1) |
| Richer                                         | 32.5 (29.4-35.7) | 29.4 (28.8-30.0) | 12.8 (9.3-17.4)  | 26.4 (21.7-31.7) | 23.0 (19.5-26.9) |
| Richest                                        | 19.5 (16.9-22.4) | 21.6 (21.0-22.1) | 10.4 (7.2-14.8)  | 13.8 (9.5-19.7)  | 13.6 (10.4-17.7) |
| Household's highest education                  |                  |                  |                  |                  |                  |
| No education                                   | 42.6 (39.1-46.1) | 48.6 (48.1-49.1) | 30.9 (24.7-37.9) | 36.6 (32.6-40.8) | 35.8 (33.1-38.5) |
| Primary                                        | 44.5 (41.7-47.4) | 42.7 (42.0-43.4) | 20.9 (17.7-24.5) | 31.9 (26.6-37.7) | 27.6 (23.2-32.5) |
| Secondary                                      | 32.9 (30.8-35.1) | 33.2 (32.8-33.6) | 12.1 (9.5-15.2)  | 23.1 (19.3-27.5) | 15.0 (11.8-19.0) |
| Higher                                         | 23.0 (19.0-27.6) | 20.0 (19.3-20.7) | 16.7 (8.5-30.2)  | 16.1 (11.3-22.6) | 8.0 (4.8-12.9)   |
| <b>Prevalence of overweight, % (95% CIs)</b>   |                  |                  |                  |                  |                  |
| Overall                                        | 2.4 (1.9-2.9)    | 3.5 (3.4-3.6)    | 9.2 (7.7-10.8)   | 2.8 (2.1-3.8)    | 7.3 (6.3-8.5)    |
| Wealth index                                   |                  |                  |                  |                  |                  |
| Poorest                                        | 1.7 (1.1-2.8)    | 2.8 (2.7-3.0)    | 5.9 (3.6-9.4)    | 3.9 (2.2-6.9)    | 9.0 (6.8-11.9)   |
| Poorer                                         | 1.5 (0.8-2.6)    | 2.9 (2.7-3.1)    | 8.8 (5.9-12.9)   | 1.5 (0.6-3.7)    | 7.9 (5.7-10.9)   |
| Middle                                         | 1.6 (1.0-2.8)    | 3.2 (3.0-3.4)    | 7.7 (5.1-11.5)   | 0.4 (0.1-2.3)    | 5.9 (3.9-8.8)    |
| Richer                                         | 1.6 (1.0-2.7)    | 3.9 (3.7-4.2)    | 12.7 (9.1-17.3)  | 5.1 (3.1-8.3)    | 5.5 (3.8-7.9)    |
| Richest                                        | 5.5 (4.1-7.3)    | 5.5 (5.2-5.9)    | 11.0 (7.7-15.4)  | 3.8 (1.8-7.8)    | 8.0 (5.6-11.3)   |
| Education level                                |                  |                  |                  |                  |                  |
| No education                                   | 1.6 (0.9-2.7)    | 3.0 (2.8-3.1)    | 7.0 (4.2-11.7)   | 2.5 (1.5-4.2)    | 7.4 (6.0-9.0)    |
| Primary                                        | 1.6 (1.0-2.5)    | 3.1 (2.9-3.4)    | 6.1 (4.4-8.4)    | 1.2 (0.4-3.5)    | 8.8 (6.2-12.2)   |
| Secondary                                      | 2.3 (1.7-3.0)    | 3.5 (3.3-3.6)    | 13.1 (10.5-16.3) | 4.8 (3.1-7.3)    | 4.7 (3.0-7.3)    |
| Higher                                         | 7.0 (4.8-10.0)   | 6.0 (5.6-6.4)    | 8.9 (3.5-21.1)   | 1.8 (0.6-5.4)    | 9.4 (5.9-14.6)   |

\*Sampling weights provided by the Demographic and Health Survey (DHS) and Stata's survey estimation procedures were used to estimate country-representative prevalence.

**Table S2: Prevalence of stunting with 95% confidence intervals (95% CIs) in five South Asian countries, overall and by household's wealth index and highest education level**

|                               | Prevalence of stunting*, % (95% CI) |                  |                  |                  |                  |
|-------------------------------|-------------------------------------|------------------|------------------|------------------|------------------|
|                               | Bangladesh                          | India            | Maldives         | Nepal            | Pakistan         |
| Overall                       | 41.6 (40.2-43.1)                    | 41.8 (41.5-42.1) | 16.5 (14.6-18.6) | 41.6 (39.0-44.2) | 48.2 (46.1-50.3) |
| Wealth index                  |                                     |                  |                  |                  |                  |
| Poorest                       | 58.8 (55.7-61.9)                    | 56.9 (56.4-57.4) | 19.6 (15.2-24.7) | 58.2 (52.3-63.8) | 62.3 (57.9-66.4) |
| Poorer                        | 49.9 (46.4-53.4)                    | 48.0 (47.4-48.5) | 20.8 (16.3-26.2) | 42.8 (37.3-48.4) | 61.0 (56.3-65.5) |
| Middle                        | 41.3 (38.0-44.8)                    | 39.9 (39.3-40.5) | 16.9 (12.9-21.7) | 42.4 (37.0-48.0) | 47.3 (42.1-52.4) |
| Richer                        | 35.4 (32.3-38.7)                    | 30.7 (30.1-31.3) | 13.5 (9.9-18.2)  | 37.2 (31.9-42.8) | 41.3 (37.0-45.7) |
| Richest                       | 19.4 (16.7-22.3)                    | 22.8 (22.2-23.4) | 11.9 (8.5-16.4)  | 19.9 (14.7-26.4) | 22.8 (18.7-27.6) |
| Household's highest education |                                     |                  |                  |                  |                  |
| No education                  | 51.3 (47.7-54.8)                    | 55.0 (54.6-55.5) | 21.0 (15.8-27.5) | 51.6 (47.4-55.8) | 58.8 (56.0-61.6) |
| Primary                       | 52.5 (49.7-55.4)                    | 47.0 (46.3-47.7) | 18.5 (15.5-22.0) | 41.1 (35.3-47.1) | 50.3 (45.1-55.5) |
| Secondary                     | 34.4 (32.3-36.6)                    | 35.2 (34.8-35.6) | 14.1 (11.3-17.3) | 35.3 (30.8-40.0) | 26.6 (22.5-31.2) |
| Higher                        | 24.4 (20.3-29.1)                    | 21.3 (20.5-22.0) | 6.8 (2.3-18.5)   | 26.1 (20.0-33.4) | 20.5 (15.2-27.0) |

\*Sampling weights provided by the Demographic and Health Survey (DHS) and Stata's survey estimation procedures were used to estimate country-representative prevalence.

**Table S3: Prevalence of wasting with 95% confidence intervals (95% CIs) in five South Asian countries, overall and by household's wealth index and highest education level**

|                               | Prevalence of wasting*, % (95% CI) |                  |                  |                |                 |
|-------------------------------|------------------------------------|------------------|------------------|----------------|-----------------|
|                               | Bangladesh                         | India            | Maldives         | Nepal          | Pakistan        |
| Overall                       | 12.5 (11.6-13.6)                   | 17.9 (17.7-18.1) | 11.1 (9.5-12.9)  | 6.4 (5.2-7.8)  | 6.9 (5.9-8.1)   |
| Wealth index                  |                                    |                  |                  |                |                 |
| Poorest                       | 13.3 (11.3-15.6)                   | 20.0 (19.5-20.4) | 14.8 (11.0-19.5) | 5.9 (3.7-9.4)  | 11.9 (9.4-15.1) |
| Poorer                        | 15.0 (12.6-17.6)                   | 18.6 (18.1-19.0) | 13.7 (10.0-18.5) | 7.4 (5.0-11.0) | 5.5 (3.7-8.1)   |
| Middle                        | 11.8 (9.8-14.3)                    | 17.3 (16.8-17.7) | 12.5 (9.1-16.9)  | 6.7 (4.4-10.1) | 5.4 (3.4-8.2)   |
| Richer                        | 12.2 (10.2-14.5)                   | 16.8 (16.3-17.2) | 6.6 (4.1-10.3)   | 6.4 (4.1-9.8)  | 4.7 (3.1-7.0)   |
| Richest                       | 10.3 (8.4-12.6)                    | 15.6 (15.1-16.1) | 7.8 (5.1-11.8)   | 4.9 (2.6-9.2)  | 6.1 (4.0-9.2)   |
| Household's highest education |                                    |                  |                  |                |                 |
| No education                  | 9.1 (7.2-11.3)                     | 19.1 (18.8-19.5) | 16.8 (12.1-22.8) | 8.0 (6.0-10.7) | 7.6 (6.2-9.3)   |
| Primary                       | 14.0 (12.2-16.1)                   | 18.3 (17.8-18.9) | 12.1 (9.6-15.1)  | 7.4 (4.8-11.2) | 7.3 (5.0-10.5)  |
| Secondary                     | 13.0 (11.6-14.6)                   | 17.7 (17.4-18.0) | 8.1 (6.0-10.8)   | 4.6 (3.0-7.2)  | 5.2 (3.4-7.9)   |
| Higher                        | 12.5 (9.5-16.3)                    | 14.2 (13.6-14.8) | 13.2 (6.1-26.2)  | 3.9 (1.8-8.2)  | 5.1 (2.7-9.4)   |

\*Sampling weights provided by the Demographic and Health Survey (DHS) and Stata's survey estimation procedures were used to estimate country-representative prevalence.

**Table S4: Associations of household's wealth index and highest education with childhood stunting**

|                               | Bangladesh         |                | India              |                | Maldives           |                | Nepal              |                | Pakistan           |                |
|-------------------------------|--------------------|----------------|--------------------|----------------|--------------------|----------------|--------------------|----------------|--------------------|----------------|
|                               | Minimally-adjusted | Fully-adjusted |
| Household's wealth index      |                    |                |                    |                |                    |                |                    |                |                    |                |
| Poorest                       | 1.0 (Ref)          | 1.0 (Ref)      |
| Poorer                        | 0.7 (0.6-0.8)      | 0.8 (0.7-0.9)  | 0.7 (0.7-0.7)      | 0.8 (0.8-0.9)  | 1.2 (0.9-1.5)      | 1.3 (0.9-1.8)  | 0.5 (0.4-0.6)      | 0.5 (0.4-0.6)  | 0.9 (0.7-1.1)      | 0.9 (0.7-1.1)  |
| Middle                        | 0.5 (0.5-0.6)      | 0.7 (0.6-0.8)  | 0.5 (0.5-0.5)      | 0.7 (0.7-0.7)  | 0.9 (0.6-1.1)      | 1.1 (0.8-1.5)  | 0.4 (0.4-0.6)      | 0.4 (0.3-0.5)  | 0.6 (0.5-0.8)      | 0.6 (0.5-0.7)  |
| Richer                        | 0.4 (0.3-0.5)      | 0.5 (0.5-0.6)  | 0.4 (0.3-0.4)      | 0.5 (0.5-0.6)  | 0.8 (0.5-1.1)      | 1.0 (0.7-1.4)  | 0.4 (0.3-0.5)      | 0.4 (0.3-0.5)  | 0.5 (0.4-0.6)      | 0.4 (0.3-0.5)  |
| Richest                       | 0.2 (0.2-0.2)      | 0.3 (0.3-0.4)  | 0.2 (0.2-0.3)      | 0.4 (0.4-0.5)  | 0.6 (0.3-1.1)      | 0.8 (0.3-2.1)  | 0.2 (0.1-0.2)      | 0.2 (0.1-0.3)  | 0.2 (0.2-0.3)      | 0.2 (0.2-0.3)  |
| Household's highest education |                    |                |                    |                |                    |                |                    |                |                    |                |
| No education                  | 1.0 (Ref)          | 1.0 (Ref)      |
| Primary                       | 0.9 (0.8-1.0)      | 0.9 (0.8-1.1)  | 0.8 (0.8-0.8)      | 0.9 (0.9-0.9)  | 0.9 (0.7-1.1)      | 0.9 (0.7-1.1)  | 0.6 (0.5-0.8)      | 0.7 (0.5-0.9)  | 0.8 (0.6-1.0)      | 1.1 (0.9-1.4)  |
| Secondary                     | 0.4 (0.4-0.5)      | 0.6 (0.6-0.7)  | 0.5 (0.5-0.5)      | 0.7 (0.7-0.7)  | 0.6 (0.4-0.7)      | 0.5 (0.4-0.7)  | 0.5 (0.4-0.7)      | 0.8 (0.7-1.0)  | 0.3 (0.3-0.4)      | 0.6 (0.5-0.8)  |
| Higher                        | 0.3 (0.2-0.3)      | 0.6 (0.5-0.8)  | 0.2 (0.2-0.2)      | 0.5 (0.5-0.5)  | 0.3 (0.1-1.1)      | 0.3 (0.1-1.4)  | 0.4 (0.3-0.5)      | 0.6 (0.4-0.9)  | 0.3 (0.2-0.4)      | 0.6 (0.4-0.8)  |

\* Minimally adjusted models were adjusted for child's age and sex; and fully-adjusted models were additionally adjusted for area of residence, receiving vitamin A and deworming drug, access to improved sanitation and drinking water, number of under-five children, mother's age at first birth, mother's height, and mother's BMI. Analyses were conducted using sampling weights provided by the Demographic and Health Survey (DHS) and Stata's survey estimation procedures.

**Table S5: Associations of household's wealth index and highest education with childhood wasting**

|                               | Bangladesh         |                | India              |                | Maldives           |                | Nepal              |                | Pakistan           |                |
|-------------------------------|--------------------|----------------|--------------------|----------------|--------------------|----------------|--------------------|----------------|--------------------|----------------|
|                               | Minimally-adjusted | Fully-adjusted |
| Household's wealth index      |                    |                |                    |                |                    |                |                    |                |                    |                |
| Poorest                       | 1.0 (0.8-1.2)      | 1.0 (0.8-1.3)  | 1.0 (1.0-1.0)      | 1.0 (1.0-1.0)  | 1.0 (0.7-1.4)      | 1.0 (0.7-1.5)  | 1.0 (0.6-1.5)      | 1.0 (0.6-1.6)  | 1.0 (0.7-1.4)      | 1.0 (0.6-1.6)  |
| Poorer                        | 1.1 (0.9-1.3)      | 1.1 (0.9-1.3)  | 0.8 (0.8-0.8)      | 0.9 (0.9-0.9)  | 0.9 (0.6-1.2)      | 0.9 (0.6-1.3)  | 1.1 (0.7-1.8)      | 1.0 (0.6-1.5)  | 0.6 (0.4-1.0)      | 0.7 (0.5-1.2)  |
| Middle                        | 0.9 (0.7-1.1)      | 0.9 (0.7-1.1)  | 0.7 (0.7-0.8)      | 0.9 (0.9-0.9)  | 0.9 (0.6-1.2)      | 1.0 (0.7-1.5)  | 1.2 (0.8-1.8)      | 1.0 (0.6-1.5)  | 0.7 (0.5-1.1)      | 0.9 (0.6-1.4)  |
| Richer                        | 0.7 (0.6-0.9)      | 0.8 (0.6-0.9)  | 0.7 (0.7-0.7)      | 0.9 (0.9-0.9)  | 0.6 (0.4-1.0)      | 1.1 (0.7-1.7)  | 1.1 (0.7-1.8)      | 1.2 (0.7-1.8)  | 0.6 (0.4-0.9)      | 0.9 (0.6-1.4)  |
| Richest                       | 0.7 (0.5-0.9)      | 0.8 (0.6-1.1)  | 0.6 (0.6-0.7)      | 0.9 (0.8-0.9)  | 0.4 (0.2-0.8)      | 1.3 (0.3-5.0)  | 0.8 (0.4-1.6)      | 1.1 (0.5-2.5)  | 0.7 (0.5-1.1)      | 1.0 (0.6-1.8)  |
| Household's highest education |                    |                |                    |                |                    |                |                    |                |                    |                |
| No education                  | 1.0 (0.8-1.3)      | 1.0 (0.8-1.3)  | 1.0 (1.0-1.0)      | 1.0 (1.0-1.0)  | 1.0 (0.7-1.4)      | 1.0 (0.6-1.6)  | 1.0 (0.7-1.4)      | 1.0 (0.7-1.4)  | 1.0 (0.8-1.3)      | 1.0 (0.7-1.5)  |
| Primary                       | 1.4 (1.2-1.6)      | 1.5 (1.2-1.7)  | 0.9 (0.9-0.9)      | 0.9 (0.9-1.0)  | 0.8 (0.6-1.0)      | 0.8 (0.6-1.0)  | 0.9 (0.5-1.4)      | 1.0 (0.6-1.6)  | 0.8 (0.5-1.3)      | 1.0 (0.6-1.5)  |
| Secondary                     | 1.2 (1.0-1.4)      | 1.4 (1.2-1.6)  | 0.8 (0.8-0.8)      | 0.9 (0.9-0.9)  | 0.5 (0.4-0.7)      | 0.6 (0.4-0.8)  | 0.6 (0.4-1.0)      | 0.7 (0.5-1.0)  | 0.9 (0.6-1.3)      | 1.0 (0.6-1.5)  |
| Higher                        | 1.1 (0.8-1.5)      | 1.6 (1.1-2.3)  | 0.7 (0.6-0.7)      | 0.8 (0.8-0.9)  | 0.7 (0.2-2.3)      | 1.8 (0.5-6.9)  | 0.4 (0.2-0.9)      | 0.4 (0.2-1.0)  | 0.9 (0.5-1.5)      | 0.9 (0.5-1.6)  |

\* Minimally adjusted models were adjusted for child's age and sex; and fully-adjusted models were additionally adjusted for area of residence, receiving vitamin A and deworming drug, access to improved sanitation and drinking water, number of under-five children, mother's age at first birth, mother's height, and mother's BMI. Analyses were conducted using sampling weights provided by the Demographic and Health Survey (DHS) and Stata's survey estimation procedures.

**Table S6: Socioeconomic status-adjusted odds ratios (ORs) of stunting for various child, household and maternal factors**

|                                          | OR (95% CI)*  |               |                |               |               |
|------------------------------------------|---------------|---------------|----------------|---------------|---------------|
|                                          | Bangladesh    | India         | Maldives       | Nepal         | Pakistan      |
| <b>Child's variables</b>                 |               |               |                |               |               |
| Sex                                      |               |               |                |               |               |
| Male                                     | 1.0 (Ref)     | 1.0 (Ref)     | 1.0 (Ref)      | 1.0 (Ref)     | 1.0 (Ref)     |
| Female                                   | 1.0 (0.9-1.1) | 1.0 (1.0-1.0) | 1.3 (1.0-1.8)  | 1.0 (0.8-1.2) | 0.9 (0.8-1.1) |
| Age                                      |               |               |                |               |               |
| 2-3 years                                | 1.0 (Ref)     | 1.0 (Ref)     | 1.0 (Ref)      | 1.0 (Ref)     | 1.0 (Ref)     |
| 3-4 years                                | 1.1 (1.0-1.3) | 1.0 (1.0-1.1) | 0.9 (0.6-1.2)  | 0.7 (0.5-0.9) | 0.9 (0.7-1.1) |
| 4-5 years                                | 0.8 (0.7-0.9) | 0.9 (0.8-0.9) | 0.5 (0.4-0.8)  | 0.7 (0.5-0.9) | 0.8 (0.6-1.0) |
| Received vitamin A in last 6 months      |               |               |                |               |               |
| No                                       | 1.0 (Ref)     | 1.0 (Ref)     | 1.0 (Ref)      | 1.0 (Ref)     | 1.0 (Ref)     |
| Yes                                      | 1.0 (0.9-1.2) | 1.0 (1.0-1.0) | 1.1 (0.7-1.7)  | 0.8 (0.5-1.1) | 1.1 (0.9-1.3) |
| Received deworming drug in last 6 months |               |               |                |               |               |
| No                                       | 1.0 (Ref)     | 1.0 (Ref)     | 1.0 (Ref)      | 1.0 (Ref)     | 1.0 (Ref)     |
| Yes                                      | 1.0 (0.9-1.1) | 0.9 (0.9-1.0) | 1.1 (0.7-1.6)  | 1.0 (0.8-1.3) | 0.8 (0.6-1.0) |
| <b>Household variables</b>               |               |               |                |               |               |
| Area of residence                        |               |               |                |               |               |
| Urban                                    | 1.0 (Ref)     | 1.0 (Ref)     | 1.0 (Ref)      | 1.0 (Ref)     | 1.0 (Ref)     |
| Rural                                    | 0.9 (0.8-1.1) | 0.9 (0.9-1.0) | 0.9 (0.4-2.0)  | 1.0 (0.8-1.3) | 0.7 (0.6-0.9) |
| Improved access to sanitation            |               |               |                |               |               |
| No                                       | 1.0 (Ref)     | 1.0 (Ref)     | 1.0 (Ref)      | 1.0 (Ref)     | 1.0 (Ref)     |
| Yes                                      | 0.8 (0.7-1.0) | 0.9 (0.9-0.9) | 0.7 (0.4-1.2)  | 0.6 (0.5-0.8) | 1.3 (1.0-1.7) |
| Improved access to drinking water        |               |               |                |               |               |
| No                                       | 1.0 (Ref)     | 1.0 (Ref)     | 1.0 (Ref)      | 1.0 (Ref)     | 1.0 (Ref)     |
| Yes                                      | 0.9 (0.8-1.2) | 1.2 (1.1-1.2) | 1.0 (0.5-1.7)  | 1.1 (0.8-1.5) | 1.2 (1.0-1.6) |
| No. of children under five               | 1.2 (1.1-1.3) | 1.1 (1.1-1.1) | 1.0 (0.9-1.2)  | 1.1 (1.0-1.3) | 1.1 (1.0-1.2) |
| <b>Maternal variables</b>                |               |               |                |               |               |
| Mother's age at first birth              |               |               |                |               |               |
| Less than 20 years                       | 1.1 (0.9-1.3) | 1.1 (1.1-1.1) | 0.8 (0.6-1.2)  | 0.8 (0.7-1.1) | 0.9 (0.7-1.1) |
| 20-24 years                              | 1.0 (Ref)     | 1.0 (Ref)     | 1.0 (Ref)      | 1.0 (Ref)     | 1.0 (Ref)     |
| 25 years or more                         | 0.6 (0.4-0.9) | 0.8 (0.8-0.8) | 1.0 (0.7-1.6)  | 0.5 (0.3-0.9) | 0.8 (0.6-1.0) |
| Mother's BMI category                    |               |               |                |               |               |
| Normal weight                            | 1.0 (Ref)     | 1.0 (Ref)     | 1.0 (Ref)      | 1.0 (Ref)     | 1.0 (Ref)     |
| Underweight                              | 1.3 (1.1-1.5) | 1.3 (1.2-1.3) | 0.9 (0.5-1.6)  | 1.4 (1.1-1.9) | 1.7 (1.2-2.3) |
| Overweight                               | 0.7 (0.6-0.8) | 0.8 (0.7-0.8) | 0.9 (0.7-1.2)  | 0.6 (0.4-0.8) | 1.0 (0.8-1.2) |
| Mother's height category                 |               |               |                |               |               |
| <145 cm                                  | 4.9 (3.9-6.3) | 3.5 (3.4-3.7) | 6.2 (3.6-10.7) | 4.1 (2.7-6.1) | 3.7 (2.2-6.2) |
| 145-149 cm                               | 2.5 (2.1-3.0) | 2.2 (2.1-2.3) | 3.3 (2.1-5.4)  | 2.7 (2.0-3.8) | 2.3 (1.7-3.0) |
| 150-154 cm                               | 1.9 (1.5-2.2) | 1.5 (1.5-1.6) | 2.5 (1.6-4.0)  | 1.6 (1.2-2.2) | 1.4 (1.1-1.7) |
| 155 cm or more                           | 1.0 (Ref)     | 1.0 (Ref)     | 1.0 (Ref)      | 1.0 (Ref)     | 1.0 (Ref)     |

\* Logistic regression models were adjusted for household's wealth index and highest education. Analyses were conducted using sampling weights provided by the Demographic and Health Survey (DHS) and Stata's survey estimation procedures.



**Table S7: Socioeconomic status-adjusted odds ratios (ORs) of wasting for various child, household and maternal factors**

|                                          | OR (95% CI)*  |               |               |               |               |
|------------------------------------------|---------------|---------------|---------------|---------------|---------------|
|                                          | Bangladesh    | India         | Maldives      | Nepal         | Pakistan      |
| <b>Child's variables</b>                 |               |               |               |               |               |
| Sex                                      |               |               |               |               |               |
| Male                                     | 1.0 (Ref)     |
| Female                                   | 1.0 (0.8-1.2) | 0.9 (0.8-0.9) | 0.8 (0.6-1.1) | 0.9 (0.6-1.4) | 0.7 (0.5-1.0) |
| Age                                      |               |               |               |               |               |
| 2-3 years                                | 1.0 (Ref)     |
| 3-4 years                                | 1.0 (0.8-1.2) | 0.9 (0.9-0.9) | 1.1 (0.7-1.7) | 0.8 (0.5-1.4) | 0.9 (0.6-1.4) |
| 4-5 years                                | 1.2 (0.9-1.5) | 0.9 (0.8-0.9) | 1.3 (0.9-2.0) | 0.9 (0.6-1.6) | 0.7 (0.5-1.1) |
| Received vitamin A in last 6 months      |               |               |               |               |               |
| No                                       | 1.0 (Ref)     |
| Yes                                      | 1.1 (0.9-1.3) | 1.1 (1.1-1.1) | 1.6 (0.9-2.9) | 0.6 (0.3-1.0) | 1.0 (0.7-1.4) |
| Received deworming drug in last 6 months |               |               |               |               |               |
| No                                       | 1.0 (Ref)     |
| Yes                                      | 0.9 (0.7-1.1) | 1.0 (1.0-1.1) | 1.8 (1.0-2.9) | 1.1 (0.6-1.8) | 0.7 (0.5-1.1) |
| <b>Household variables</b>               |               |               |               |               |               |
| Area of residence                        |               |               |               |               |               |
| Urban                                    | 1.0 (Ref)     |
| Rural                                    | 1.1 (0.9-1.4) | 0.9 (0.9-1.0) | 2.7 (0.9-7.8) | 0.6 (0.4-0.9) | 1.0 (0.6-1.5) |
| Improved access to sanitation            |               |               |               |               |               |
| No                                       | 1.0 (Ref)     |
| Yes                                      | 1.2 (0.9-1.4) | 0.9 (0.8-0.9) | 0.7 (0.4-1.4) | 0.6 (0.4-1.0) | 0.7 (0.5-1.1) |
| Improved access to drinking water        |               |               |               |               |               |
| No                                       | 1.0 (Ref)     |
| Yes                                      | 1.2 (0.9-1.6) | 1.0 (1.0-1.1) | 1.5 (0.7-3.2) | 1.5 (0.7-3.3) | 0.6 (0.4-0.9) |
| No. of children under five               | 0.9 (0.8-1.0) | 0.9 (0.9-1.0) | 1.1 (0.9-1.3) | 0.8 (0.6-1.0) | 1.0 (0.9-1.1) |
| <b>Maternal variables</b>                |               |               |               |               |               |
| Mother's age at first birth              |               |               |               |               |               |
| Less than 20 years                       | 1.0 (0.8-1.3) | 1.0 (1.0-1.0) | 1.1 (0.8-1.6) | 1.1 (0.7-1.7) | 0.9 (0.6-1.4) |
| 20-24 years                              | 1.0 (Ref)     |
| 25 years or more                         | 0.9 (0.6-1.5) | 0.9 (0.9-1.0) | 0.6 (0.4-1.2) | 1.1 (0.4-2.6) | 1.1 (0.7-1.8) |
| Mother's BMI category                    |               |               |               |               |               |
| Normal weight                            | 1.0 (Ref)     |
| Underweight                              | 1.5 (1.2-1.9) | 1.4 (1.4-1.5) | 1.7 (1.0-3.0) | 1.7 (1.0-2.8) | 1.3 (0.8-2.1) |
| Overweight                               | 0.6 (0.4-0.8) | 0.6 (0.6-0.6) | 0.7 (0.5-1.0) | 0.5 (0.2-1.1) | 0.6 (0.4-0.9) |
| Mother's height category                 |               |               |               |               |               |
| <145 cm                                  | 1.3 (1.0-1.8) | 1.0 (1.0-1.1) | 1.0 (0.6-1.8) | 1.1 (0.6-2.2) | 1.4 (0.6-3.0) |
| 145-149 cm                               | 1.1 (0.9-1.5) | 1.1 (1.0-1.1) | 0.6 (0.4-1.0) | 1.0 (0.6-1.7) | 0.9 (0.5-1.5) |
| 150-154 cm                               | 1.0 (0.8-1.3) | 1.0 (1.0-1.1) | 1.1 (0.7-1.7) | 0.7 (0.4-1.2) | 1.2 (0.8-1.8) |
| 155 cm or more                           | 1.0 (Ref)     |

\* Logistic regression models were adjusted for household's wealth index and highest education. Analyses were conducted using sampling weights provided by the Demographic and Health Survey (DHS) and Stata's survey estimation procedures.
